# Supplementary material
Source: PubMed Central journal article supplement (PMC2563909)
Supplement: supp_82_suppl-5_v38__1.pdf [file supp_82_suppl-5_v38__1.pdf]

**Appendix 1: Characteristics of the different syphilis POC tests**

| Rapid test             | Cost<br>( $C_r$ ) | Test setting     | Test done on serum                        |                                            |                                            | Test done on blood                        |                                            |                                            |
|------------------------|-------------------|------------------|-------------------------------------------|--------------------------------------------|--------------------------------------------|-------------------------------------------|--------------------------------------------|--------------------------------------------|
|                        |                   |                  | Sensitivity<br>for syphilis<br>( $S_r$ )† | Specificity<br>for syphilis<br>( $Sp_r$ )† | Sensitivity for<br>HTAS<br>( $S_r^{Hi}$ )‡ | Sensitivity<br>for syphilis<br>( $S_r$ )† | Specificity<br>for syphilis<br>( $Sp_r$ )† | Sensitivity<br>for HTAS<br>( $S_r^{Hi}$ )‡ |
| Determine<br>(Abbot)   | \$1.00            | Antenatal clinic |                                           |                                            |                                            | 59.6%<br>(45.8-72.4%)                     | 99.4%<br>(98.1-99.9%)                      | 92.3%<br>(64.0-99.8%)                      |
|                        |                   | Laboratory       | 91.2%<br>(80.7-97.1%)                     | 97.9%<br>(96.1-99.0%)                      | 92.9%<br>(66.1-99.8%)                      | 80.7%<br>(68.1-90.0%)                     | 99.4%<br>(98.1-99.9%)                      | 92.9%<br>(66.1-99.8%)                      |
| Visitect<br>(Omega)    | \$0.75            | Antenatal clinic |                                           |                                            |                                            | 75.4%<br>(62.2-85.9%)                     | 99.8%<br>(98.8-100%)                       | 100%<br>(75.3-100%)                        |
|                        |                   | Laboratory       | 84.2%<br>(72.1-92.5%)                     | 99.1%<br>(97.8-99.8%)                      | 100%<br>(75.3-100%)                        | 80.7%<br>(68.1-90.0%)                     | 99.6%<br>(98.5-99.9%)                      | 100%<br>(75.3-100%)                        |
| Syphcheck<br>(Qualpro) | \$0.75            | Antenatal clinic |                                           |                                            |                                            | 78.6%<br>(65.6-88.4%)                     | 99.1%<br>(97.8-99.7%)                      | 100%<br>(78.2-100%)                        |
|                        |                   | Laboratory       | 87.3%<br>(75.5-94.7%)                     | 98.9%<br>(97.5-99.6%)                      | 100%<br>(78.2-100%)                        | 85.4%<br>(7.3-93.5%)                      | 99.1%<br>(97.8-99.7%)                      | 100%<br>(78.2-100%)                        |
| Bioline<br>(Standard)  | \$0.47            | Antenatal clinic |                                           |                                            |                                            | 85.7%<br>(74.6-93.2%)                     | 98.1%<br>(96.4-99.1%)                      | 94.7%<br>(74.0-99.9%)                      |
|                        |                   | Laboratory       | 90.9%<br>(81.3-96.6%)                     | 95.5%<br>(93.4-97.1%)                      | 100%<br>(83.2-100%)                        | 90.9%<br>(81.3-96.6%)                     | 96.1%<br>(94.1-97.6%)                      | 95.0%<br>(75.1-99.9%)                      |

† The sensitivity and specificity of each POC test was calculated using the TPPA test as a gold standard.

‡ The sensitivity of each POC test for high titre active syphilis was calculated using a gold standard of a positive TPPA test result and an RPR titre  $\geq 1:8$ , both tests being undertaken in the reference laboratory.

**Appendix 2:** Methods used to estimate the sensitivity and specificity of the RPR test used at the ANC clinic [1].

Over the 26 months from September 1997 to November 1999, 19,878 women were screened for syphilis by RPR testing at the ANC clinic [3], and 1522 were found to be RPR sero-positive. Amongst these women, a sub-sample of 556 RPR positive and 1132 RPR negative women were also tested using the RPR test at a reference laboratory. When these test results were compared with the RPR test results obtained at the ANC clinic the following was found:

**Table 1:** Comparison of ANC and reference laboratory RPR results

|                   | <b>Reference laboratory</b> |              |       |      |
|-------------------|-----------------------------|--------------|-------|------|
|                   | RPR positive                | RPR negative | Total |      |
| <b>ANC clinic</b> | RPR positive                | 508          | 48    | 556  |
|                   | RPR negative                | 53           | 1079  | 1132 |
|                   | Total                       | 561          | 1127  | 1688 |

Because this sub-sample was selected on the basis of the screening test at the ANC clinic, it is necessary to adjust for this weighting to calculate the sensitivity and specificity of the on-site test. When this was done the following was obtained:

**Table 2:** Comparison of ANC and reference laboratory RPR results adjusted for weighted sampling.

|                   | <b>Reference laboratory</b> |              |         |       |
|-------------------|-----------------------------|--------------|---------|-------|
|                   | RPR positive                | RPR negative | Total   |       |
| <b>ANC clinic</b> | RPR positive                | 1390.6       | 131.4   | 1522  |
|                   | RPR negative                | 859.4        | 17496.6 | 18356 |
|                   | Total                       | 2250         | 17628   | 19878 |

After having adjusted for the weighted sample, the sensitivity and specificity of the RPR test undertaken at the ANC clinic was found to be 61.8% (1390.6/2250) and 99.25% (17496.6/17628) respectively.

**Appendix 3:** Derivation of the equation for the threshold cost of a POC test

The threshold cost ( $C_r^*$ ) of a POC test is defined as the test cost that results in the cost-effectiveness of using POC tests ( $CE_r$ ) being equal to the cost-effectiveness of using RPR tests ( $CE_{RPR}$ ). This is true when the following applies:

$$\frac{COST_r}{N^{Hi} S_r^{Hi} DALY_{tan}} = \frac{COST_{RPR}}{N^{Hi} S_{RPR}^{Hi} DALY_{tan}}$$

After cancellation of some common terms this can be written as follows:

$$\frac{(COST_r - \Delta_t^r) + \Delta_t^r}{S_r^{Hi}} = \frac{COST_{RPR}}{S_{RPR}^{Hi}},$$

where  $\Delta_t^r$  is the total test cost when using POC tests and the term  $(COST_r - \Delta_t^r)$  is the total cost of the using POC tests without the test costs included. If we then substitute the formulation for  $\Delta_t^r$  (equation 6 in manuscript) in to the equation the following is obtained:

$$\frac{(COST_r - \Delta_t^r) + C_r^* N (1 + \delta W)}{S_r^{Hi}} = \frac{COST_{RPR}}{S_{RPR}^{Hi}},$$

where  $N$  is the total number of women screened,  $\delta W$  is the percentage wastage of POC tests and  $C_r^*$  is the threshold cost of the POC test. This equation can then be manipulated to give:

$$C_r^* N (1 + \delta W) = \frac{S_r^{Hi}}{S_{RPR}^{Hi}} COST_{RPR} - (COST_r - \Delta_t^r),$$

and so the following formulation for  $C_r^*$  is easily obtained:

$$C_r^* = \frac{1}{N (1 + \delta W)} \left[ \frac{S_r^{Hi}}{S_{RPR}^{Hi}} COST_{RPR} - (COST_r - \Delta_t^r) \right]$$

**Appendix 4:** Uncertainty analysis on the incremental (or additional) cost and effectiveness of using different syphilis POC tests compared to using the RPR test.

**2a.** POC tests used on blood

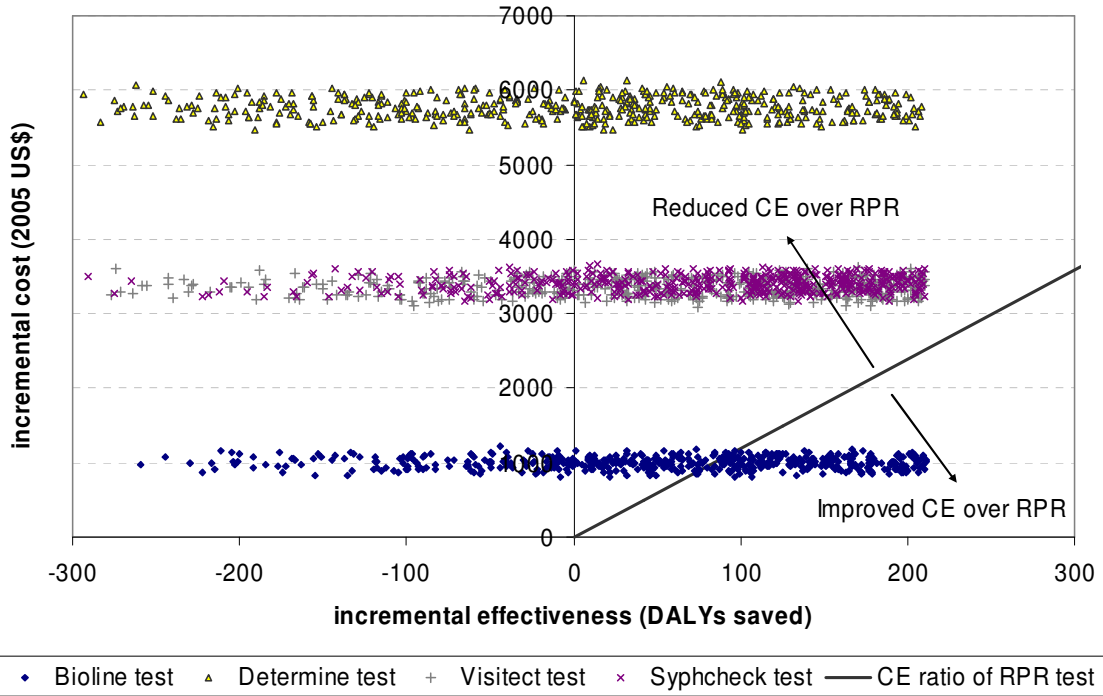

**2b.** POC tests used on serum

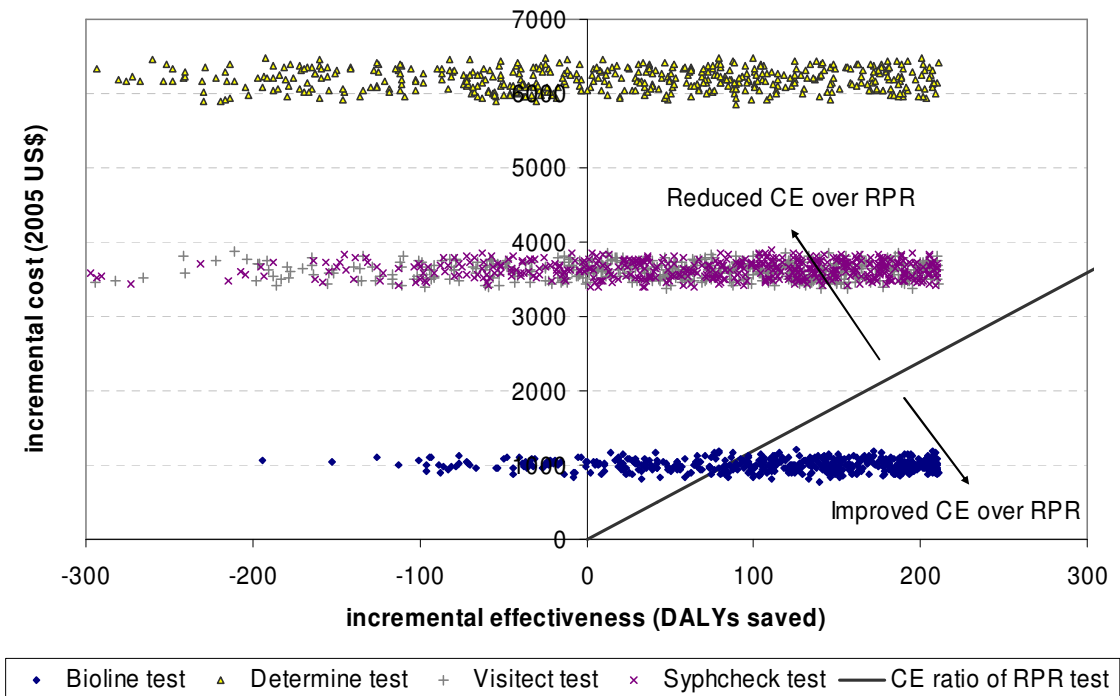

**Appendix 5:** Cost thresholds (in 2005 US\$) for the POC tests to be as cost-effective as the RPR test for different sensitivities for HTAS

| POC test            | Test substrate | Threshold test cost (US\$) for different sensitivities of POC test for HTAS ( $S_r^{Hi}$ ) |        |        |        |        |
|---------------------|----------------|--------------------------------------------------------------------------------------------|--------|--------|--------|--------|
|                     |                | 80%                                                                                        | 85%    | 90%    | 95%    | 100%   |
| Determine (Abbot)   | Blood          | \$0.27                                                                                     | \$0.36 | \$0.45 | \$0.54 | \$0.63 |
|                     | Serum          | \$0.24                                                                                     | \$0.33 | \$0.42 | \$0.51 | \$0.60 |
| Visitect (Omega)    | Blood          | \$0.27                                                                                     | \$0.36 | \$0.45 | \$0.54 | \$0.63 |
|                     | Serum          | \$0.25                                                                                     | \$0.34 | \$0.43 | \$0.52 | \$0.61 |
| Syphcheck (Qualpro) | Blood          | \$0.27                                                                                     | \$0.36 | \$0.45 | \$0.54 | \$0.63 |
|                     | Serum          | \$0.25                                                                                     | \$0.34 | \$0.43 | \$0.52 | \$0.61 |
| Bioline (Standard)  | Blood          | \$0.25                                                                                     | \$0.34 | \$0.43 | \$0.52 | \$0.61 |
|                     | Serum          | \$0.23                                                                                     | \$0.32 | \$0.41 | \$0.50 | \$0.59 |

**Appendix 6:** Sensitivity analysis comparing the relative cost-effectiveness of the Bioline test (on blood in an ANC clinic) with the cost-effectiveness of the RPR test in other settings (both per DALY saved in 2005 US\$). ‘-’ signifies that the variation in the parameter value does not affect the output. Numbers in ‘( )’ are percentage change in cost-effectiveness of using that test.

| Scenario                              | Initial value of model parameter to be varied     | Minimum parameter value (% change) | CE with RPR test | CE with POC test |                  | Maximum parameter value (% change) | CE with RPR test | CE with POC test |                  |
|---------------------------------------|---------------------------------------------------|------------------------------------|------------------|------------------|------------------|------------------------------------|------------------|------------------|------------------|
|                                       |                                                   |                                    |                  | $S_r^{Hi}=90\%$  | $S_r^{Hi}=100\%$ |                                    |                  | $S_r^{Hi}=90\%$  | $S_r^{Hi}=100\%$ |
| Baseline scenario                     | <i>No parameters varied</i>                       |                                    | 12.0 (0%)        | 12.0 (0%)        | 10.8 (0%)        |                                    | 12.0 (0%)        | 12.0 (0%)        | 10.8 (0%)        |
| Lower sensitivity of RPR test         | $S_{RPR}^{Hi}=86.2\%$ (sens RPR for HTAS)         | $S_{RPR}^{Hi}=75\%$ [2]            | 13.8 (+15%)      | -                | -                | $S_{RPR}^{Hi}=100\%$               | 10.3 (-14%)      | -                | -                |
| Not all women return for treatment    | $R_{RPR}=100\%$ (return rate for RPR test)        | $R_{RPR}=60\%$ (-40%) [3]          | 19.8 (+65%)      | -                | -                | $R_{RPR}=80\%$ (-20%) [4-6]        | 15.0 (+25%)      | -                | -                |
| Different prev of RPR false positives | $N_{RPR}=696$ (Number of RPR positives at clinic) | $N_{RPR}=563$ (-20%) [7]           | 11.9 (-1%)       | -                | -                | $N_{RPR}=1301$ (+86%) [8]          | 12.2 (+2%)       | -                | -                |
| Higher prev of past infections        | $\theta=95.4$ (ratio of TPHA to RPR positives)    | $\theta=104\%$ (+9%) [9]           | -                | 12.0 (0%)        | 10.8 (0%)        | $\theta=188\%$ (+97%) [8]          | -                | 12.3 (+3%)       | 11.1 (+3%)       |
| Different prevalence of syphilis      | Syphilis prevalence=10.5%                         | Syphilis prev=5.25% (-50%)         | 23.7 (+97%)      | 23.6 (+97%)      | 21.3 (+97%)      | Syphilis prev=21% (+100%)          | 6.1 (-49%)       | 6.2 (-49%)       | 5.6 (-49%)       |

## References for the Appendices

1. Watson Jones D. **Impact of syphilis on outcome of pregnancy and evaluation of syphilis screening strategies for the reduction of adverse pregnancy outcomes in Mwanza, Tanzania.** [PhD Thesis]. London: London School of Hygiene and Tropical Medicine; 2001.
2. Patel A, Moodley D, Moodley J. An evaluation of on-site testing for syphilis. *Trop Doct* 2001, **31**:79-82.
3. Watson Jones D, Oliff M, Terris Prestholt F, Chungalucha J, Gumodoka B, Mayaud P, *et al.* Antenatal syphilis screening in sub-Saharan Africa - Lessons learnt from Tanzania. *Trop Med Int Health* 2005, **10**:934-943.
4. Myer L, Wilkinson D, Lombard C, Zuma K, Rotchford K, Abdool Karim SS. Impact of on-site testing for maternal syphilis on treatment delays, treatment rates, and perinatal mortality in rural South Africa: a randomised controlled trial. *Sexually Transmitted Infections* 2003, **32**.
5. Rotchford K, Lombard C, Zuma K, Wilkinson D. Impact on perinatal mortality of missed opportunities to treat maternal syphilis in rural South Africa: baseline results from a clinic randomized controlled trial. *Trop Med Int Health* 2000, **5**:800-804.
6. Wilkinson D, Sach M, Connolly C. Epidemiology of syphilis in pregnancy in rural South Africa: opportunities for control. *Trop Med Int Health* 1997, **2**:57-62.
7. West B, Walraven G, Morison L, Brouwers J, Bailey R. Performance of the rapid plasma reagin and the rapid syphilis screening tests in the diagnosis of syphilis in field conditions in rural Africa. *Sex Transm Infect* 2002, **78**:282-285.
8. Dorigo-Zetsma JW, Belewu D, Meless H, Sanders E, Coutinho RA, Schaap A, *et al.* Performance of routine syphilis serology in the Ethiopian cohort on HIV/AIDS. *Sexually Transmitted Infections* 2004, **80**:96-99.
9. Todd J, Munguti K, Grosskurth H, Mngara J, Chungalucha J, Mayaud P, *et al.* Risk factors for active syphilis and TPHA seroconversion in a rural African population. *Sex Transm Infect* 2001, **77**:37-45.
